# Supplementary material for: Corrections
Source: Atypon-hosted journal article supplement (doi:10.1176/appi.ajp.2013.17010), 2013-10-01

Table 1. Mother demographic and clinical measures by fetal exposure.

| Measure                         | Total<br>(N=172) | Fetal exposure |                |               | Probability values |                |               |               |
|---------------------------------|------------------|----------------|----------------|---------------|--------------------|----------------|---------------|---------------|
|                                 |                  | None<br>(N=97) | SSRI<br>(N=44) | MDD<br>(N=31) | Over-<br>all       | None v<br>SSRI | None v<br>MDD | SSRI v<br>MDD |
| Age                             | 30.5 ± 5.7       | 30.6 ± 5.4     | 31.5 ± 5.2     | 28.7 ± 7.0    | 0.112              |                |               |               |
| Race                            |                  |                |                |               | 0.006              | 0.483          | 0.014*        | 0.003*        |
| White                           | 139 (80.8)       | 81 (83.5)      | 40 (90.9)      | 18 (58.1)     |                    |                |               |               |
| Black                           | 28 (16.3)        | 14 (14.4)      | 3 (6.8)        | 11 (35.5)     |                    |                |               |               |
| Other                           | 5 (2.9)          | 2 (2.1)        | 1 (2.3)        | 2 (6.5)       |                    |                |               |               |
| White race                      | 139 (80.8)       | 81 (83.5)      | 40 (90.9)      | 18 (58.1)     | 0.001              | 0.243          | 0.003*        | <.001*        |
| Education                       |                  |                |                |               | 0.002              | 0.789          | <.001*        | 0.009*        |
| <High school                    | 10 (5.8)         | 3 (3.1)        | 2 (4.5)        | 5 (16.1)      |                    |                |               |               |
| High school                     | 14 (8.1)         | 7 (7.2)        | 2 (4.5)        | 5 (16.1)      |                    |                |               |               |
| Some college                    | 30 (17.4)        | 11 (11.3)      | 8 (18.2)       | 11 (35.5)     |                    |                |               |               |
| College                         | 71 (41.3)        | 45 (46.4)      | 19 (43.2)      | 7 (22.6)      |                    |                |               |               |
| Graduate school                 | 47 (27.3)        | 31 (32.0)      | 13 (29.5)      | 3 (9.7)       |                    |                |               |               |
| College degree                  | 118 (68.6)       | 76 (78.4)      | 32 (72.7)      | 10 (32.3)     | <.001              | 0.465          | <.001*        | <.001*        |
| Employed                        | 103 (59.9)       | 68 (70.1)      | 21 (47.7)      | 14 (45.2)     | 0.008              | 0.011*         | 0.012*        | 0.826         |
| Marital status                  |                  |                |                |               | 0.029              | 0.749          | 0.028         | 0.012*        |
| Single                          | 36 (20.9)        | 17 (17.5)      | 6 (13.6)       | 13 (41.9)     |                    |                |               |               |
| Married/cohabiting              | 131 (76.2)       | 77 (79.4)      | 36 (81.8)      | 18 (58.1)     |                    |                |               |               |
| Divorced/separated              | 5 (2.9)          | 3 (3.1)        | 2 (4.5)        | 0 (0.0)       |                    |                |               |               |
| Married                         | 131 (76.2)       | 77 (79.4)      | 36 (81.8)      | 18 (58.1)     | 0.031              | 0.737          | 0.018         | 0.024         |
| Pre-pregnancy BMI               | 26.4 ± 7.0       | 25.0 ± 5.6     | 27.3 ± 6.0     | 29.3 ± 10.5   | 0.019              | 0.010*         | 0.062         | 0.996         |
| Parity                          | 1.9 ± 0.95       | 1.7 ± 0.81     | 2.1 ± 0.95     | 2.2 ± 1.2     | 0.009              | 0.007*         | 0.025         | 0.995         |
| Parity                          |                  |                |                |               | 0.054              |                |               |               |
| 1                               | 72 (41.9)        | 49 (50.5)      | 13 (29.5)      | 10 (32.3)     |                    |                |               |               |
| 2                               | 61 (35.5)        | 33 (34.0)      | 17 (38.6)      | 11 (35.5)     |                    |                |               |               |
| 3+                              | 39 (22.7)        | 15 (15.5)      | 14 (31.8)      | 10 (32.3)     |                    |                |               |               |
| Smoked during pregnancy         | 16 (9.3)         | 8 (8.2)        | 4 (9.1)        | 4 (12.9)      | 0.738              |                |               |               |
| Drank alcohol during pregnancy  |                  |                |                |               | 0.054              |                |               |               |
| No                              | 118 (68.6)       | 67 (69.1)      | 29 (65.9)      | 22 (71.0)     |                    |                |               |               |
| Once a week or less             | 41 (23.8)        | 27 (27.8)      | 10 (22.7)      | 4 (12.9)      |                    |                |               |               |
| More than once a week           | 13 (7.6)         | 3 (3.1)        | 5 (11.4)       | 5 (16.1)      |                    |                |               |               |
| Baseline SIGH-ADS <sub>29</sub> | 11.8 ± 7.1       | 8.2 ± 4.8      | 15.3 ± 7.2     | 17.6 ± 7.0    | <.001              | <.001*         | <.001*        | 0.189         |
| Anxiety (lifetime)              | 56 (32.6)        | 23 (23.7)      | 20 (45.5)      | 13 (41.9)     | 0.018              | 0.009*         | 0.049         | 0.762         |

*Abbreviations* BMI body mass index; SIGH-ADS Structured interview guide for the Hamilton rating scale for depression with atypical depression supplement.

\*Significant after Bonferroni correction.

Table 2. Infant demographic and clinical measures by fetal exposure.

| Measure                       | Total<br>(N=176) | Fetal exposure  |                |               | Probability values |                |               |               |
|-------------------------------|------------------|-----------------|----------------|---------------|--------------------|----------------|---------------|---------------|
|                               |                  | None<br>(N=100) | SSRI<br>(N=45) | MDD<br>(N=31) | Over-<br>all       | None v<br>SSRI | None v<br>MDD | SSRI v<br>MDD |
| <37 weeks gestation at birth  | 16 (9.1)         | 5 (5.0)         | 8 (17.8)       | 3 (9.7)       | 0.046              | 0.024          | 0.393         | 0.509         |
| Sex                           |                  |                 |                |               | 0.006              | 0.001*         | 0.551         | 0.052         |
| Male                          | 98 (55.7)        | 64 (64.0)       | 16 (35.6)      | 18 (58.1)     |                    |                |               |               |
| Female                        | 78 (44.3)        | 36 (36.0)       | 29 (64.4)      | 13 (41.9)     |                    |                |               |               |
| Birth weight (g)              | 3469 ± 576       | 3563 ± 531      | 3333 ± 624     | 3366 ± 605    | 0.046              | 0.024          | 0.084         | 0.822         |
| Birth length (cm)             | 51.0 ± 2.8       | 51.4 ± 2.7      | 50.1 ± 3.0     | 51.1 ± 2.7    | 0.042              | 0.013*         | 0.644         | 0.149         |
| Birth head circumference (cm) | 34.6 ± 1.7       | 34.7 ± 1.7      | 34.2 ± 1.8     | 34.6 ± 1.6    | 0.331              |                |               |               |
| Ever breastfed                | 136 (77.3)       | 83 (83.0)       | 33 (73.3)      | 20 (64.5)     | 0.077              |                |               |               |

\*Significant after Bonferroni correction.

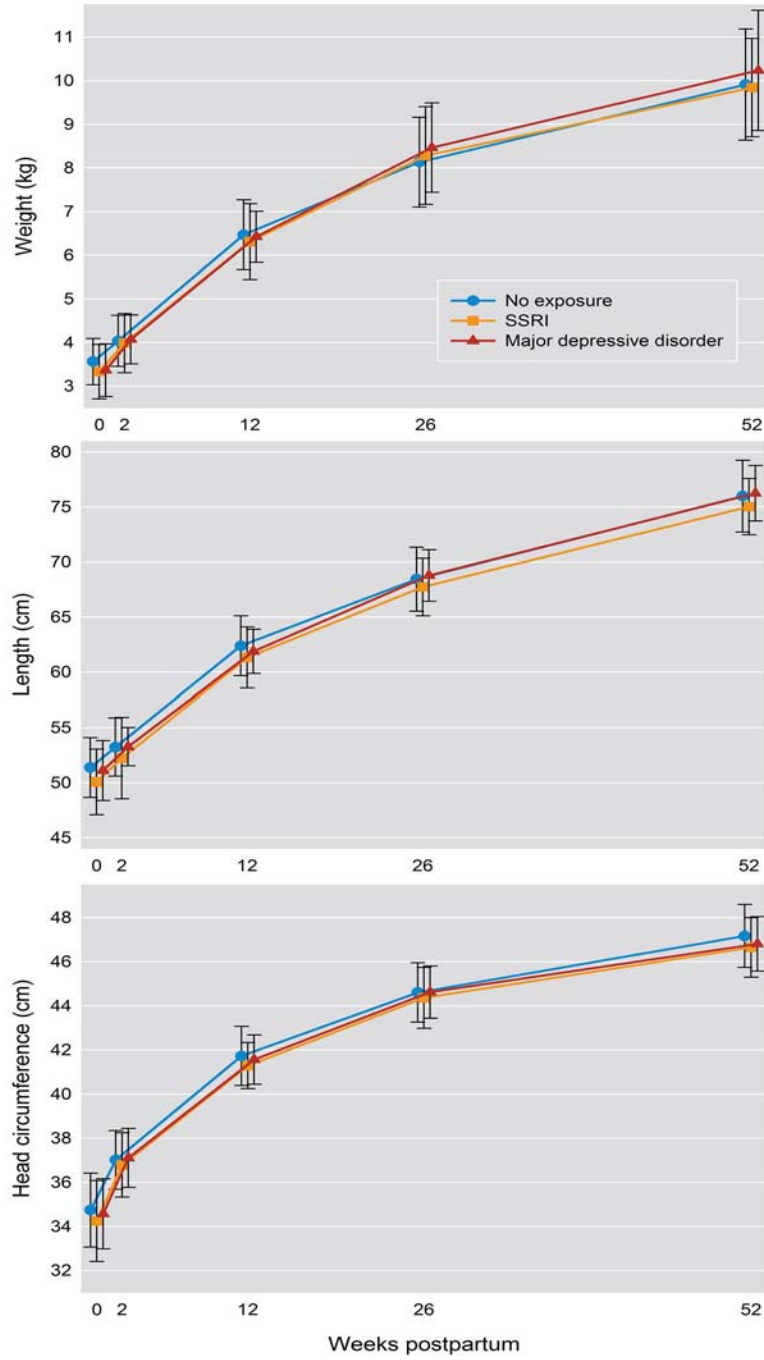

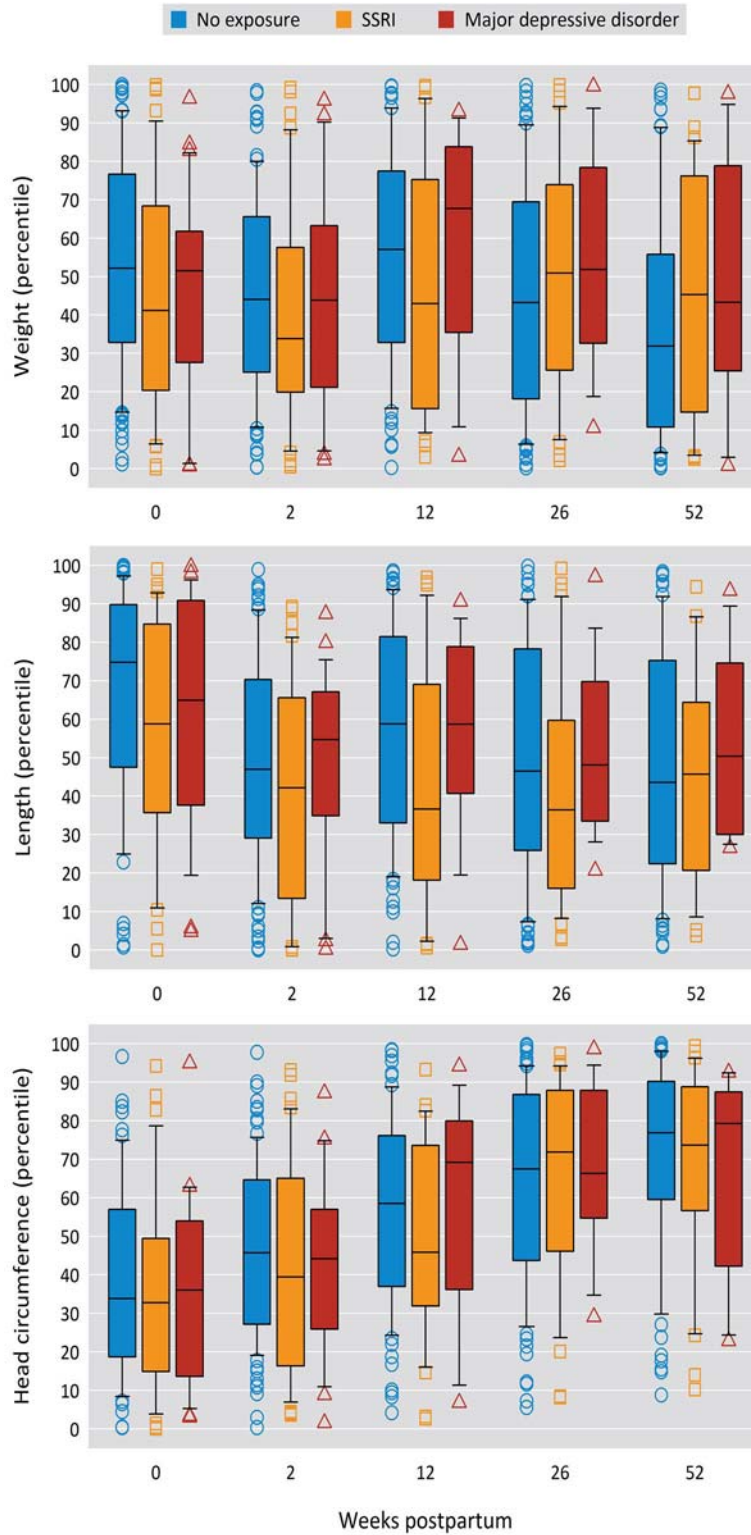

Supplement: 1218_ds001.pdf [file 1218_ds001.pdf]
